# Supplementary material
Source: publisher site journal article supplement (https://www.dovepress.com/get_supplementary_file.php?f=369718.docx)
Supplement: Supplementary file 1 [file get_supplementary_file.php]

**Supplementary materials**

Table S1 Clinicopathological characteristics of the patients with LUAD

| Characteristics | All patients  n (%) |
| --- | --- |
| Number of patients  Median age  (25th–75th percentile) | 486  66 (59-72.75) |
| Gender  Female | 263 (54%) |
| Male | 223 (46%) |
| Stage  Stage I | 263 (54%) |
| Stage II | 117 (24%) |
| Stage III | 80 (16%) |
| Stage IV | 26 (5%) |
| T stage  T1 | 166 (34%) |
| T2 | 255 (52%) |
| T3 | 44 (9%) |
| T4 | 18 (4%) |
| TX | 3 (1%) |
| M stage  M0 | 319 (66%) |
| M1 | 25 (5%) |
| MX | 142 (29%) |
| N stage  N0 | 313 (64%) |
| N1 | 90 (19%) |
| N2 | 70 (14%) |
| N3 | 2 (0%) |
| NX | 11 (2%) |

Table S2 The primer of β-actin and DE-lncRNAs.

| Type | Gene symbol | Primer Sequence |
| --- | --- | --- |
| Primers of β-actin | β-actin | F: AGGATGCAGAAGGAGATCAC |
|  |  | R: TGTAACGCAACTAAGTCATAG |
| Primers of 7 lncRNAs | MIR600HG | F: GCCAGTCTGACGTGAACAGA |
|  |  | R: GCGCTTCTATCAGGCCATCT |
|  | LINC00304 | F: GCAAGTCACCTGTTCCAGTTCT |
|  |  | R: CAATTCTGCACATGCTTCGAT |
|  | TMEM105 | F: TTATCTCCTTACCTGGTCTTTGTTC |
|  |  | R: CTTCATGTCTTCGCCTTCTTATC |
|  | MIR22HG | F: CTGGCTGGATTGAGGAGTAGAA |
|  |  | R: TGGAAGTAGGGCGGTGAAG |
|  | HHLA3 | F: TTGTATTTCGTCTGGCAACCTT |
|  |  | R: CAAGACCCCTGATGGTGTTTT |
|  | MIR137HG | F: ACTGTCTTGAGGAAGGGCACC |
|  |  | R: CCCCATCTCCAAATACCATCAT |
|  | ZNF295-AS1 | F: TTTGTGCCTCACTTTGTCGG |
|  |  | R: TCTCAAGTCAGTATCACCTCCCTC |

Table S3 Information of top 20 DE-lncRNAs and DE-mRNAs

| DE-lncRNAs | log2FC | adj.P.Val | DE-mRNAs | log2FC | adj.P.Val |
| --- | --- | --- | --- | --- | --- |
| WAKMAR2 | -2.313669401 | 2.53E-30 | SUSD2 | -4.466018161 | 7.82E-48 |
| LINC02882 | 2.241447084 | 2.53E-30 | FAM9B | 5.147365416 | 8.13E-48 |
| LINC02864 | 2.574911941 | 4.16E-28 | PNPLA4 | 4.474324814 | 1.08E-47 |
| LINC00665 | 1.146134733 | 8.71E-27 | MAGEA9 | 3.833442683 | 9.44E-46 |
| LINC02432 | -2.548228623 | 2.47E-25 | GPC6 | -6.655573783 | 1.83E-45 |
| LINC01361 | 2.955206284 | 2.49E-25 | RNF212 | 4.112970668 | 4.90E-45 |
| HERPUD2-AS1 | 2.045859933 | 3.08E-25 | SNURF | 4.888068792 | 6.82E-43 |
| LINC02478 | -2.810046633 | 1.13E-24 | VCX2 | 2.331641081 | 1.27E-42 |
| LINC01905 | 1.798189493 | 1.18E-24 | CALB1 | 4.509458107 | 2.62E-42 |
| LINC00659 | 1.811141631 | 1.94E-24 | VCX3B | 2.53369406 | 7.31E-42 |
| TRAM2-AS1 | 1.592711634 | 7.77E-24 | VCX | 2.331360292 | 1.02E-40 |
| IRF1-AS1 | -1.980855551 | 1.58E-22 | AXL | 3.373336141 | 2.36E-40 |
| MIR31HG | 1.547822565 | 5.35E-21 | CYRIA | -2.620494188 | 4.84E-39 |
| LINC01914 | -3.313027161 | 7.41E-21 | HTRA3 | 3.001747712 | 1.00E-38 |
| SFTA1P | -1.748407274 | 1.52E-20 | GPX2 | 4.096866091 | 1.18E-38 |
| CHROMR | 1.963755845 | 2.98E-20 | MELTF | 3.464840337 | 1.32E-38 |
| GMDS-DT | 1.287987507 | 3.41E-20 | SAA2 | -3.975585986 | 1.29E-37 |
| FUT8-AS1 | 1.307552773 | 4.17E-20 | HPR | -4.066339481 | 1.84E-37 |
| LINC01588 | -1.464805525 | 1.82E-19 | KCNS1 | -4.4741435 | 1.23E-35 |
| LINC01234 | -1.674503236 | 2.31E-19 | LOXL4 | 3.078211326 | 1.58E-35 |

Table S4 GefR-related lncRNA, miRNA, and mRNA in the ceRNA network

| Type | Name |
| --- | --- |
| lncRNA | MIR31HG,SNHG11,CASC2,LINC00304,WDFY3-AS2,C6orf223,TMEM105, MIR22HG,HHLA3,UCA1,MIR17HG,LGALS8-AS1,SFTA1P,RUSC1-AS1, RBM26-AS1, MAST4-AS1,MIR205HG,MIR137HG,SRGAP3-AS4, MIR600HG, ZNF295-AS1, ST3GAL6-AS1, LIFR-AS1, LINC00461, SNHG9, ARHGAP5-AS1 |
| miRNA | hsa-miR-17-5p,hsa-miR-125a-5p,hsa-miR-125b-5p,hsa-miR-24-3p,hsa-miR-1297,hsa-miR-363-3p,hsa-miR-142-3p,hsa-miR-20b-5p,hsa-miR-613,hsa-miR-429,hsa-miR-139-5p,hsa-miR-22-3p,hsa-miR-3619-5p,hsa-miR-301b-3p,hsa-miR-107,hsa-miR-206,hsa-miR-27a-3p,hsa-miR-33a-3p,hsa-miR-590-5p,hsa-miR-425-5p,hsa-miR-140-5p,hsa-miR-10a-5p,hsa-miR-129-5p,hsa-miR-507,hsa-miR-216b-5p,hsa-miR-184,hsa-miR-193a-3p,hsa-miR-23b-3p,hsa-miR-455-5p, hsa-miR-876-3p,hsa-miR-338-3p,hsa-miR-761,hsa-miR-135a-5p,hsa-miR-1244, hsa-miR-146b-5p |
| mRNA | SAMD12,MASTL,MMP11,PODXL,CDH7,TCF4,FKTN,FBXW7,KAT2B,PPP1R15B,PRR14L,FSCN1,EP300,ZNF367,EFR3B,ADAT2,ANKRD33B,IRF1,TNFAIP3,TRIM37,MAP1B,ATL3,CPEB3,TRAF7,C9orf72,DYNLL2,ABCA1,LOXL2,MAP3K8,C17orf75,C1QTNF3,RRM2,FOS,EPM2AIP1,LONRF3,MAGI1,DCBLD2,GSK3B,CMTM3,EOGT,STAT3,GALNT14,UHMK1,SPRED1,GAB2,HOXB3,TMEM242,ANKRD50,PSD3,KANK4,DSTYK,SESN2,DENND5B,SATB1,M6PR,GNAL,GALNT1,PLAG1,HEG1,CDKN1A,KLF10,OCRL,RAPGEF4,COL4A4,PHLPP2,BMF,PIAS2,BCL2,UBB,WASF3,RAB5B,TGFB2,CYP1B1,CPOX,VLDLR,NHLRC3,PAIP1,DPY19L4,CBX1,MKLN1,GATA6,PLSCR4,NR4A2,JAG2,GAB1,GSG1,GABBR2,STK17B,SFRP1,CPT1A,PDE11A,ETS1,NR2F2,IER3IP1,ZNF24,ATP2A2,RAB11FIP1,KIAA0513,BHLHB9,KATNAL1,TRABD2A, USP5,SLC2A3,NFAT5,PCTP,TNRC18,TP63,ONECUT2,KLF12,RNF165, SGTB, ATAD2,ADORA2B,GALNT16,CSF1R,NPAS3,SMARCE1,TGFBR3,TET3,KATNBL1,BTN3A2,ATF7IP,ETV1,EN2,SLC26A2,SPTLC3,RASSF8,PNPLA4,PSAT1,FAXC,PIP5K1C,MTMR9,ITPR1,FSD2,ZBTB10,GPR155,CLIP4,LFNG,RBFOX2,GNS,DAB2,TIAM2,PPM1H,PEG10,FZD4,COX20,PRSS8,BACH2,PAQR8,ENDOU,USP3,JAZF1,SLC25A25,GDF11,LBR,VGLL3,TSPAN3,IL6R,PLXND1,HIPK2,S100P,OGT,CMTM4,SIRPA,SNAP29,PHIP,FAS,HOXA5,ZNF395,SAT1,MMP16,PLEKHA8,OLR1,ZNF552,SH3PXD2A,PAG1,MB21D2,F2R,VDR |

Table S5 The miRNA-lncRNA and miRNA-mRNA interaction pairs in ceRNA network

| Type | Interaction pairs/ node1 | Interaction pairs/node2 |
| --- | --- | --- |
| miRNA-lncRNA  miRNA-lncRNA  miRNA-lncRNA  miRNA-lncRNA  miRNA-lncRNA  miRNA-lncRNA  miRNA-lncRNA  miRNA-lncRNA  miRNA-lncRNA  miRNA-lncRNA  miRNA-lncRNA  miRNA-lncRNA  miRNA-lncRNA  miRNA-lncRNA  miRNA-lncRNA  miRNA-lncRNA  miRNA-lncRNA  miRNA-lncRNA  miRNA-lncRNA  miRNA-lncRNA  miRNA-lncRNA  miRNA-lncRNA  miRNA-lncRNA  miRNA-lncRNA  miRNA-lncRNA  miRNA-lncRNA  miRNA-lncRNA  miRNA-lncRNA  miRNA-lncRNA  miRNA-lncRNA  miRNA-lncRNA  miRNA-lncRNA  miRNA-lncRNA  miRNA-lncRNA  miRNA-lncRNA  miRNA-lncRNA  miRNA-lncRNA  miRNA-lncRNA  miRNA-lncRNA  miRNA-lncRNA  miRNA-lncRNA  miRNA-lncRNA  miRNA-lncRNA  miRNA-lncRNA  miRNA-lncRNA  miRNA-lncRNA  miRNA-lncRNA  miRNA-lncRNA  miRNA-lncRNA  miRNA-lncRNA  miRNA-lncRNA  miRNA-lncRNA  miRNA-lncRNA  miRNA-lncRNA  miRNA-lncRNA  miRNA-lncRNA  miRNA-lncRNA  miRNA-lncRNA  miRNA-lncRNA  miRNA-lncRNA  miRNA-lncRNA  miRNA-lncRNA  miRNA-lncRNA  miRNA-lncRNA  miRNA-lncRNA  miRNA-lncRNA  miRNA-lncRNA  miRNA-lncRNA  miRNA-lncRNA  miRNA-lncRNA  miRNA-lncRNA  miRNA-lncRNA  miRNA-lncRNA  miRNA-lncRNA  miRNA-lncRNA  miRNA-lncRNA  miRNA-lncRNA  miRNA-lncRNA  miRNA-lncRNA  miRNA-lncRNA  miRNA-lncRNA  miRNA-lncRNA  miRNA-lncRNA  miRNA-lncRNA  miRNA-lncRNA  miRNA-lncRNA  miRNA-lncRNA  miRNA-lncRNA  miRNA-lncRNA  miRNA-lncRNA  miRNA-lncRNA  miRNA-lncRNA  miRNA-lncRNA  miRNA-lncRNA  miRNA-lncRNA  miRNA-lncRNA  miRNA-lncRNA  miRNA-lncRNA  miRNA-lncRNA  miRNA-lncRNA  miRNA-lncRNA  miRNA-lncRNA  miRNA-lncRNA  miRNA-lncRNA  miRNA-lncRNA  miRNA-lncRNA  miRNA-lncRNA  miRNA-lncRNA  miRNA-lncRNA  miRNA-lncRNA  miRNA-lncRNA  miRNA-lncRNA  miRNA-lncRNA  miRNA-lncRNA  miRNA-lncRNA  miRNA-lncRNA  miRNA-lncRNA  miRNA-lncRNA  miRNA-lncRNA  miRNA-lncRNA  miRNA-lncRNA  miRNA-lncRNA  miRNA-lncRNA  miRNA-lncRNA  miRNA-lncRNA  miRNA-lncRNA  miRNA-lncRNA  miRNA-lncRNA  miRNA-lncRNA  miRNA-lncRNA  miRNA-lncRNA  miRNA-lncRNA  miRNA-lncRNA  miRNA-lncRNA  miRNA-lncRNA  miRNA-lncRNA  miRNA-lncRNA  miRNA-lncRNA  miRNA-lncRNA  miRNA-lncRNA  miRNA-lncRNA  miRNA-lncRNA  miRNA-lncRNA  miRNA-lncRNA  miRNA-lncRNA  miRNA-lncRNA  miRNA-lncRNA  miRNA-lncRNA  miRNA-lncRNA  miRNA-lncRNA  miRNA-lncRNA  miRNA-lncRNA  miRNA-lncRNA  miRNA-lncRNA  miRNA-lncRNA  miRNA-lncRNA  miRNA-lncRNA  miRNA-lncRNA  miRNA-lncRNA  miRNA-lncRNA  miRNA-lncRNA  miRNA-lncRNA  miRNA-lncRNA  miRNA-lncRNA  miRNA-lncRNA  miRNA-lncRNA  miRNA-lncRNA  miRNA-lncRNA  miRNA-lncRNA  miRNA-lncRNA  miRNA-lncRNA  miRNA-lncRNA  miRNA-lncRNA  miRNA-lncRNA  miRNA-lncRNA  miRNA-lncRNA  miRNA-lncRNA  miRNA-lncRNA  miRNA-lncRNA  miRNA-lncRNA  miRNA-lncRNA  miRNA-lncRNA  miRNA-lncRNA  miRNA-lncRNA  miRNA-lncRNA  miRNA-lncRNA  miRNA-lncRNA  miRNA-lncRNA  miRNA-lncRNA  miRNA-lncRNA  miRNA-lncRNA  miRNA-lncRNA  miRNA-lncRNA  miRNA-lncRNA  miRNA-lncRNA  miRNA-lncRNA  miRNA-lncRNA  miRNA-lncRNA  miRNA-lncRNA  miRNA-lncRNA  miRNA-lncRNA  miRNA-lncRNA  miRNA-lncRNA  miRNA-lncRNA  miRNA-lncRNA  miRNA-lncRNA  miRNA-lncRNA  miRNA-lncRNA  miRNA-lncRNA  miRNA-lncRNA  miRNA-lncRNA  miRNA-lncRNA  miRNA-lncRNA  miRNA-lncRNA  miRNA-lncRNA  miRNA-lncRNA  miRNA-lncRNA  miRNA-lncRNA  miRNA-lncRNA  miRNA-lncRNA  miRNA-lncRNA  miRNA-lncRNA  miRNA-lncRNA  miRNA-lncRNA  miRNA-lncRNA  miRNA-lncRNA  miRNA-lncRNA  miRNA-lncRNA  miRNA-lncRNA  miRNA-lncRNA  miRNA-lncRNA  miRNA-lncRNA  miRNA-lncRNA  miRNA-lncRNA  miRNA-lncRNA  miRNA-lncRNA  miRNA-lncRNA  miRNA-lncRNA  miRNA-lncRNA | MIR31HG  MIR31HG  MIR31HG  MIR31HG  MIR31HG  MIR31HG  SNHG11  SNHG11  SNHG11  SNHG11  SNHG11  SNHG11  SNHG11  SNHG11  SNHG11  CASC2  CASC2  CASC2  CASC2  CASC2  CASC2  CASC2  CASC2  CASC2  CASC2  CASC2  CASC2  CASC2  CASC2  CASC2  CASC2  CASC2  CASC2  CASC2  CASC2  CASC2  CASC2  CASC2  CASC2  LINC00304  LINC00304  LINC00304  LINC00304  LINC00304  LINC00304  LINC00304  LINC00304  LINC00304  LINC00304  LINC00304  LINC00304  WDFY3-AS2  WDFY3-AS2  WDFY3-AS2  WDFY3-AS2  WDFY3-AS2  WDFY3-AS2  WDFY3-AS2  WDFY3-AS2  WDFY3-AS2  WDFY3-AS2  WDFY3-AS2  WDFY3-AS2  WDFY3-AS2  WDFY3-AS2  WDFY3-AS2  WDFY3-AS2  WDFY3-AS2  WDFY3-AS2  C6orf223  C6orf223  C6orf223  C6orf223  C6orf223  C6orf223  TMEM105  TMEM105  TMEM105  TMEM105  TMEM105  TMEM105  TMEM105  TMEM105  TMEM105  TMEM105  TMEM105  TMEM105  TMEM105  TMEM105  TMEM105  MIR22HG  MIR22HG  MIR22HG  MIR22HG  MIR22HG  HHLA3  HHLA3  HHLA3  HHLA3  HHLA3  HHLA3  HHLA3  HHLA3  HHLA3  UCA1  UCA1  UCA1  UCA1  UCA1  UCA1  UCA1  UCA1  UCA1  UCA1  UCA1  UCA1  UCA1  MIR17HG  MIR17HG  MIR17HG  LGALS8-AS1  LGALS8-AS1  LGALS8-AS1  LGALS8-AS1  SFTA1P  SFTA1P  SFTA1P  RUSC1-AS1  RUSC1-AS1  RUSC1-AS1  RUSC1-AS1  RUSC1-AS1  RUSC1-AS1  RUSC1-AS1  RUSC1-AS1  RUSC1-AS1  RUSC1-AS1  RUSC1-AS1  RUSC1-AS1  RUSC1-AS1  RBM26-AS1  RBM26-AS1  RBM26-AS1  RBM26-AS1  RBM26-AS1  RBM26-AS1  RBM26-AS1  RBM26-AS1  RBM26-AS1  RBM26-AS1  MAST4-AS1  MAST4-AS1  MIR205HG  MIR205HG  MIR205HG  MIR205HG  MIR205HG  MIR205HG  MIR205HG  MIR205HG  MIR205HG  MIR205HG  MIR205HG  MIR205HG  MIR205HG  MIR205HG  MIR205HG  MIR137HG  MIR137HG  MIR137HG  MIR137HG  MIR137HG  MIR137HG  MIR137HG  MIR137HG  MIR137HG  MIR137HG  SRGAP3-AS4  SRGAP3-AS4  SRGAP3-AS4  SRGAP3-AS4  SRGAP3-AS4  MIR600HG  MIR600HG  MIR600HG  MIR600HG  MIR600HG  MIR600HG  MIR600HG  MIR600HG  MIR600HG  MIR600HG  MIR600HG  MIR600HG  MIR600HG  MIR600HG  MIR600HG  ZNF295-AS1  ZNF295-AS1  ZNF295-AS1  ST3GAL6-AS1  LIFR-AS1  LIFR-AS1  LIFR-AS1  LIFR-AS1  LIFR-AS1  LIFR-AS1  LIFR-AS1  LIFR-AS1  LIFR-AS1  LIFR-AS1  LIFR-AS1  LIFR-AS1  LIFR-AS1  LIFR-AS1  LINC00461  LINC00461  LINC00461  LINC00461  LINC00461  LINC00461  LINC00461  LINC00461  LINC00461  LINC00461  LINC00461  LINC00461  LINC00461  LINC00461  LINC00461  LINC00461  LINC00461  SNHG9  ARHGAP5-AS1  ARHGAP5-AS1  ARHGAP5-AS1  ARHGAP5-AS1  ARHGAP5-AS1  ARHGAP5-AS1 | hsa-miR-193a-3p  hsa-miR-206  hsa-miR-613  hsa-miR-761  hsa-miR-3619-5p  hsa-miR-27a-3p  hsa-miR-139-5p  hsa-miR-17-5p  hsa-miR-20b-5p  hsa-miR-184  hsa-miR-761  hsa-miR-3619-5p  hsa-miR-22-3p  hsa-miR-24-3p  hsa-miR-107  hsa-miR-301b-3p  hsa-miR-135a-5p  hsa-miR-140-5p  hsa-miR-876-3p  hsa-miR-1244  hsa-miR-17-5p  hsa-miR-20b-5p  hsa-miR-193a-3p  hsa-miR-206  hsa-miR-613  hsa-miR-429  hsa-miR-590-5p  hsa-miR-761  hsa-miR-3619-5p  hsa-miR-216b-5p  hsa-miR-23b-3p  hsa-miR-24-3p  hsa-miR-363-3p  hsa-miR-27a-3p  hsa-miR-107  hsa-miR-338-3p  hsa-miR-425-5p  hsa-miR-125a-5p  hsa-miR-125b-5p  hsa-miR-135a-5p  hsa-miR-184  hsa-miR-193a-3p  hsa-miR-206  hsa-miR-613  hsa-miR-761  hsa-miR-3619-5p  hsa-miR-24-3p  hsa-miR-1297  hsa-miR-338-3p  hsa-miR-10a-5p  hsa-miR-455-5p  hsa-miR-507  hsa-miR-135a-5p  hsa-miR-139-5p  hsa-miR-142-3p  hsa-miR-206  hsa-miR-613  hsa-miR-429  hsa-miR-590-5p  hsa-miR-23b-3p  hsa-miR-24-3p  hsa-miR-1297  hsa-miR-27a-3p  hsa-miR-107  hsa-miR-338-3p  hsa-miR-33a-3p  hsa-miR-425-5p  hsa-miR-455-5p  hsa-miR-129-5p  hsa-miR-761  hsa-miR-3619-5p  hsa-miR-23b-3p  hsa-miR-338-3p  hsa-miR-125a-5p  hsa-miR-125b-5p  hsa-miR-146b-5p  hsa-miR-17-5p  hsa-miR-20b-5p  hsa-miR-184  hsa-miR-193a-3p  hsa-miR-761  hsa-miR-3619-5p  hsa-miR-22-3p  hsa-miR-23b-3p  hsa-miR-24-3p  hsa-miR-1297  hsa-miR-107  hsa-miR-125a-5p  hsa-miR-125b-5p  hsa-miR-10a-5p  hsa-miR-206  hsa-miR-613  hsa-miR-24-3p  hsa-miR-363-3p  hsa-miR-425-5p  hsa-miR-135a-5p  hsa-miR-139-5p  hsa-miR-140-5p  hsa-miR-876-3p  hsa-miR-1244  hsa-miR-206  hsa-miR-613  hsa-miR-24-3p  hsa-miR-27a-3p  hsa-miR-507  hsa-miR-135a-5p  hsa-miR-184  hsa-miR-193a-3p  hsa-miR-206  hsa-miR-613  hsa-miR-761  hsa-miR-3619-5p  hsa-miR-23b-3p  hsa-miR-1297  hsa-miR-107  hsa-miR-455-5p  hsa-miR-129-5p  hsa-miR-23b-3p  hsa-miR-425-5p  hsa-miR-455-5p  hsa-miR-142-3p  hsa-miR-22-3p  hsa-miR-125a-5p  hsa-miR-125b-5p  hsa-miR-206  hsa-miR-613  hsa-miR-216b-5p  hsa-miR-507  hsa-miR-135a-5p  hsa-miR-139-5p  hsa-miR-193a-3p  hsa-miR-761  hsa-miR-3619-5p  hsa-miR-216b-5p  hsa-miR-22-3p  hsa-miR-363-3p  hsa-miR-125a-5p  hsa-miR-125b-5p  hsa-miR-10a-5p  hsa-miR-455-5p  hsa-miR-140-5p  hsa-miR-876-3p  hsa-miR-1244  hsa-miR-17-5p  hsa-miR-20b-5p  hsa-miR-206  hsa-miR-613  hsa-miR-429  hsa-miR-216b-5p  hsa-miR-27a-3p  hsa-miR-23b-3p  hsa-miR-1297  hsa-miR-301b-3p  hsa-miR-206  hsa-miR-613  hsa-miR-761  hsa-miR-3619-5p  hsa-miR-216b-5p  hsa-miR-22-3p  hsa-miR-23b-3p  hsa-miR-24-3p  hsa-miR-27a-3p  hsa-miR-107  hsa-miR-33a-3p  hsa-miR-10a-5p  hsa-miR-455-5p  hsa-miR-129-5p  hsa-miR-135a-5p  hsa-miR-139-5p  hsa-miR-146b-5p  hsa-miR-22-3p  hsa-miR-24-3p  hsa-miR-363-3p  hsa-miR-27a-3p  hsa-miR-107  hsa-miR-338-3p  hsa-miR-129-5p  hsa-miR-17-5p  hsa-miR-20b-5p  hsa-miR-590-5p  hsa-miR-27a-3p  hsa-miR-338-3p  hsa-miR-507  hsa-miR-139-5p  hsa-miR-146b-5p  hsa-miR-761  hsa-miR-3619-5p  hsa-miR-22-3p  hsa-miR-23b-3p  hsa-miR-24-3p  hsa-miR-27a-3p  hsa-miR-107  hsa-miR-338-3p  hsa-miR-125a-5p  hsa-miR-125b-5p  hsa-miR-10a-5p  hsa-miR-129-5p  hsa-miR-301b-3p  hsa-miR-24-3p  hsa-miR-27a-3p  hsa-miR-338-3p  hsa-miR-507  hsa-miR-140-5p  hsa-miR-876-3p  hsa-miR-1244  hsa-miR-146b-5p  hsa-miR-193a-3p  hsa-miR-206  hsa-miR-613  hsa-miR-216b-5p  hsa-miR-22-3p  hsa-miR-24-3p  hsa-miR-363-3p  hsa-miR-27a-3p  hsa-miR-129-5p  hsa-miR-507  hsa-miR-135a-5p  hsa-miR-139-5p  hsa-miR-140-5p  hsa-miR-876-3p  hsa-miR-1244  hsa-miR-216b-5p  hsa-miR-22-3p  hsa-miR-23b-3p  hsa-miR-363-3p  hsa-miR-27a-3p  hsa-miR-107  hsa-miR-338-3p  hsa-miR-425-5p  hsa-miR-125a-5p  hsa-miR-125b-5p  hsa-miR-455-5p  hsa-miR-184  hsa-miR-140-5p  hsa-miR-876-3p  hsa-miR-1244  hsa-miR-27a-3p  hsa-miR-125a-5p  hsa-miR-125b-5p |
| miRNA-mRNA  miRNA-mRNA  miRNA-mRNA  miRNA-mRNA  miRNA-mRNA  miRNA-mRNA  miRNA-mRNA  miRNA-mRNA  miRNA-mRNA  miRNA-mRNA  miRNA-mRNA  miRNA-mRNA  miRNA-mRNA  miRNA-mRNA  miRNA-mRNA  miRNA-mRNA  miRNA-mRNA  miRNA-mRNA  miRNA-mRNA  miRNA-mRNA  miRNA-mRNA  miRNA-mRNA  miRNA-mRNA  miRNA-mRNA  miRNA-mRNA  miRNA-mRNA  miRNA-mRNA  miRNA-mRNA  miRNA-mRNA  miRNA-mRNA  miRNA-mRNA  miRNA-mRNA  miRNA-mRNA  miRNA-mRNA  miRNA-mRNA  miRNA-mRNA  miRNA-mRNA  miRNA-mRNA  miRNA-mRNA  miRNA-mRNA  miRNA-mRNA  miRNA-mRNA  miRNA-mRNA  miRNA-mRNA  miRNA-mRNA  miRNA-mRNA  miRNA-mRNA  miRNA-mRNA  miRNA-mRNA  miRNA-mRNA  miRNA-mRNA  miRNA-mRNA  miRNA-mRNA  miRNA-mRNA  miRNA-mRNA  miRNA-mRNA  miRNA-mRNA  miRNA-mRNA  miRNA-mRNA  miRNA-mRNA  miRNA-mRNA  miRNA-mRNA  miRNA-mRNA  miRNA-mRNA  miRNA-mRNA  miRNA-mRNA  miRNA-mRNA  miRNA-mRNA  miRNA-mRNA  miRNA-mRNA  miRNA-mRNA  miRNA-mRNA  miRNA-mRNA  miRNA-mRNA  miRNA-mRNA  miRNA-mRNA  miRNA-mRNA  miRNA-mRNA  miRNA-mRNA  miRNA-mRNA  miRNA-mRNA  miRNA-mRNA  miRNA-mRNA  miRNA-mRNA  miRNA-mRNA  miRNA-mRNA  miRNA-mRNA  miRNA-mRNA  miRNA-mRNA  miRNA-mRNA  miRNA-mRNA  miRNA-mRNA  miRNA-mRNA  miRNA-mRNA  miRNA-mRNA  miRNA-mRNA  miRNA-mRNA  miRNA-mRNA  miRNA-mRNA  miRNA-mRNA  miRNA-mRNA  miRNA-mRNA  miRNA-mRNA  miRNA-mRNA  miRNA-mRNA  miRNA-mRNA  miRNA-mRNA  miRNA-mRNA  miRNA-mRNA  miRNA-mRNA  miRNA-mRNA  miRNA-mRNA  miRNA-mRNA  miRNA-mRNA  miRNA-mRNA  miRNA-mRNA  miRNA-mRNA  miRNA-mRNA  miRNA-mRNA  miRNA-mRNA  miRNA-mRNA  miRNA-mRNA  miRNA-mRNA  miRNA-mRNA  miRNA-mRNA  miRNA-mRNA  miRNA-mRNA  miRNA-mRNA  miRNA-mRNA  miRNA-mRNA  miRNA-mRNA  miRNA-mRNA  miRNA-mRNA  miRNA-mRNA  miRNA-mRNA  miRNA-mRNA  miRNA-mRNA  miRNA-mRNA  miRNA-mRNA  miRNA-mRNA  miRNA-mRNA  miRNA-mRNA  miRNA-mRNA  miRNA-mRNA  miRNA-mRNA  miRNA-mRNA  miRNA-mRNA  miRNA-mRNA  miRNA-mRNA  miRNA-mRNA  miRNA-mRNA  miRNA-mRNA  miRNA-mRNA  miRNA-mRNA  miRNA-mRNA  miRNA-mRNA  miRNA-mRNA  miRNA-mRNA  miRNA-mRNA  miRNA-mRNA  miRNA-mRNA  miRNA-mRNA  miRNA-mRNA  miRNA-mRNA  miRNA-mRNA  miRNA-mRNA  miRNA-mRNA  miRNA-mRNA  miRNA-mRNA  miRNA-mRNA  miRNA-mRNA  miRNA-mRNA  miRNA-mRNA  miRNA-mRNA  miRNA-mRNA  miRNA-mRNA  miRNA-mRNA  miRNA-mRNA  miRNA-mRNA  miRNA-mRNA  miRNA-mRNA  miRNA-mRNA  miRNA-mRNA  miRNA-mRNA  miRNA-mRNA  miRNA-mRNA  miRNA-mRNA  miRNA-mRNA  miRNA-mRNA  miRNA-mRNA  miRNA-mRNA  miRNA-mRNA  miRNA-mRNA  miRNA-mRNA  miRNA-mRNA  miRNA-mRNA  miRNA-mRNA  miRNA-mRNA  miRNA-mRNA  miRNA-mRNA  miRNA-mRNA  miRNA-mRNA  miRNA-mRNA  miRNA-mRNA  miRNA-mRNA  miRNA-mRNA  miRNA-mRNA  miRNA-mRNA  miRNA-mRNA  miRNA-mRNA  miRNA-mRNA  miRNA-mRNA  miRNA-mRNA  miRNA-mRNA  miRNA-mRNA  miRNA-mRNA  miRNA-mRNA  miRNA-mRNA  miRNA-mRNA  miRNA-mRNA  miRNA-mRNA  miRNA-mRNA  miRNA-mRNA  miRNA-mRNA  miRNA-mRNA  miRNA-mRNA  miRNA-mRNA  miRNA-mRNA  miRNA-mRNA  miRNA-mRNA  miRNA-mRNA  miRNA-mRNA  miRNA-mRNA  miRNA-mRNA  miRNA-mRNA  miRNA-mRNA  miRNA-mRNA  miRNA-mRNA  miRNA-mRNA  miRNA-mRNA  miRNA-mRNA  miRNA-mRNA  miRNA-mRNA  miRNA-mRNA  miRNA-mRNA  miRNA-mRNA  miRNA-mRNA  miRNA-mRNA  miRNA-mRNA  miRNA-mRNA  miRNA-mRNA  miRNA-mRNA  miRNA-mRNA  miRNA-mRNA  miRNA-mRNA  miRNA-mRNA  miRNA-mRNA  miRNA-mRNA  miRNA-mRNA  miRNA-mRNA  miRNA-mRNA  miRNA-mRNA  miRNA-mRNA  miRNA-mRNA  miRNA-mRNA  miRNA-mRNA  miRNA-mRNA  miRNA-mRNA  miRNA-mRNA  miRNA-mRNA  miRNA-mRNA  miRNA-mRNA  miRNA-mRNA  miRNA-mRNA  miRNA-mRNA  miRNA-mRNA  miRNA-mRNA  miRNA-mRNA  miRNA-mRNA  miRNA-mRNA  miRNA-mRNA  miRNA-mRNA  miRNA-mRNA  miRNA-mRNA  miRNA-mRNA  miRNA-mRNA  miRNA-mRNA  miRNA-mRNA  miRNA-mRNA  miRNA-mRNA  miRNA-mRNA  miRNA-mRNA  miRNA-mRNA  miRNA-mRNA  miRNA-mRNA  miRNA-mRNA | hsa-miR-17-5p  hsa-miR-17-5p  hsa-miR-125a-5p  hsa-miR-125b-5p  hsa-miR-24-3p  hsa-miR-17-5p  hsa-miR-1297  hsa-miR-363-3p  hsa-miR-142-3p  hsa-miR-20b-5p  hsa-miR-613  hsa-miR-24-3p  hsa-miR-429  hsa-miR-139-5p  hsa-miR-22-3p  hsa-miR-17-5p  hsa-miR-20b-5p  hsa-miR-3619-5p  hsa-miR-301b-3p  hsa-miR-125b-5p  hsa-miR-301b-3p  hsa-miR-1297  hsa-miR-17-5p  hsa-miR-17-5p  hsa-miR-107  hsa-miR-3619-5p  hsa-miR-142-3p  hsa-miR-206  hsa-miR-27a-3p  hsa-miR-17-5p  hsa-miR-1297  hsa-miR-17-5p  hsa-miR-27a-3p  hsa-miR-24-3p  hsa-miR-33a-3p  hsa-miR-20b-5p  hsa-miR-139-5p  hsa-miR-590-5p  hsa-miR-363-3p  hsa-miR-24-3p  hsa-miR-139-5p  hsa-miR-27a-3p  hsa-miR-24-3p  hsa-miR-301b-3p  hsa-miR-125a-5p  hsa-miR-125a-5p  hsa-miR-139-5p  hsa-miR-425-5p  hsa-miR-140-5p  hsa-miR-425-5p  hsa-miR-125b-5p  hsa-miR-10a-5p  hsa-miR-17-5p  hsa-miR-20b-5p  hsa-miR-17-5p  hsa-miR-129-5p  hsa-miR-20b-5p  hsa-miR-17-5p  hsa-miR-429  hsa-miR-507  hsa-miR-17-5p  hsa-miR-20b-5p  hsa-miR-3619-5p  hsa-miR-10a-5p  hsa-miR-1297  hsa-miR-27a-3p  hsa-miR-129-5p  hsa-miR-17-5p  hsa-miR-125a-5p  hsa-miR-17-5p  hsa-miR-20b-5p  hsa-miR-17-5p  hsa-miR-216b-5p  hsa-miR-17-5p  hsa-miR-125b-5p  hsa-miR-129-5p  hsa-miR-139-5p  hsa-miR-301b-3p  hsa-miR-184  hsa-miR-429  hsa-miR-22-3p  hsa-miR-193a-3p  hsa-miR-27a-3p  hsa-miR-20b-5p  hsa-miR-17-5p  hsa-miR-20b-5p  hsa-miR-23b-3p  hsa-miR-17-5p  hsa-miR-17-5p  hsa-miR-20b-5p  hsa-miR-363-3p  hsa-miR-142-3p  hsa-miR-27a-3p  hsa-miR-17-5p  hsa-miR-142-3p  hsa-miR-363-3p  hsa-miR-425-5p  hsa-miR-129-5p  hsa-miR-20b-5p  hsa-miR-3619-5p  hsa-miR-17-5p  hsa-miR-455-5p  hsa-miR-129-5p  hsa-miR-17-5p  hsa-miR-27a-3p  hsa-miR-17-5p  hsa-miR-17-5p  hsa-miR-129-5p  hsa-miR-876-3p  hsa-miR-20b-5p  hsa-miR-507  hsa-miR-27a-3p  hsa-miR-301b-3p  hsa-miR-363-3p  hsa-miR-206  hsa-miR-17-5p  hsa-miR-142-3p  hsa-miR-24-3p  hsa-miR-429  hsa-miR-17-5p  hsa-miR-20b-5p  hsa-miR-301b-3p  hsa-miR-20b-5p  hsa-miR-125b-5p  hsa-miR-425-5p  hsa-miR-17-5p  hsa-miR-129-5p  hsa-miR-23b-3p  hsa-miR-17-5p  hsa-miR-107  hsa-miR-206  hsa-miR-125b-5p  hsa-miR-20b-5p  hsa-miR-142-3p  hsa-miR-301b-3p  hsa-miR-24-3p  hsa-miR-429  hsa-miR-216b-5p  hsa-miR-129-5p  hsa-miR-20b-5p  hsa-miR-338-3p  hsa-miR-338-3p  hsa-miR-17-5p  hsa-miR-27a-3p  hsa-miR-140-5p  hsa-miR-761  hsa-miR-20b-5p  hsa-miR-129-5p  hsa-miR-613  hsa-miR-22-3p  hsa-miR-17-5p  hsa-miR-107  hsa-miR-27a-3p  hsa-miR-142-3p  hsa-miR-140-5p  hsa-miR-27a-3p  hsa-miR-20b-5p  hsa-miR-301b-3p  hsa-miR-20b-5p  hsa-miR-363-3p  hsa-miR-17-5p  hsa-miR-33a-3p  hsa-miR-17-5p  hsa-miR-590-5p  hsa-miR-1297  hsa-miR-507  hsa-miR-17-5p  hsa-miR-107  hsa-miR-761  hsa-miR-1297  hsa-miR-206  hsa-miR-17-5p  hsa-miR-107  hsa-miR-429  hsa-miR-301b-3p  hsa-miR-20b-5p  hsa-miR-17-5p  hsa-miR-17-5p  hsa-miR-1297  hsa-miR-17-5p  hsa-miR-27a-3p  hsa-miR-363-3p  hsa-miR-206  hsa-miR-142-3p  hsa-miR-613  hsa-miR-363-3p  hsa-miR-135a-5p  hsa-miR-20b-5p  hsa-miR-20b-5p  hsa-miR-20b-5p  hsa-miR-129-5p  hsa-miR-27a-3p  hsa-miR-20b-5p  hsa-miR-129-5p  hsa-miR-125a-5p  hsa-miR-17-5p  hsa-miR-20b-5p  hsa-miR-20b-5p  hsa-miR-125a-5p  hsa-miR-507  hsa-miR-125a-5p  hsa-miR-142-3p  hsa-miR-107  hsa-miR-363-3p  hsa-miR-429  hsa-miR-761  hsa-miR-107  hsa-miR-129-5p  hsa-miR-1297  hsa-miR-129-5p  hsa-miR-3619-5p  hsa-miR-125b-5p  hsa-miR-425-5p  hsa-miR-107  hsa-miR-27a-3p  hsa-miR-135a-5p  hsa-miR-761  hsa-miR-17-5p  hsa-miR-20b-5p  hsa-miR-1297  hsa-miR-24-3p  hsa-miR-129-5p  hsa-miR-17-5p  hsa-miR-363-3p  hsa-miR-24-3p  hsa-miR-507  hsa-miR-20b-5p  hsa-miR-20b-5p  hsa-miR-129-5p  hsa-miR-129-5p  hsa-miR-17-5p  hsa-miR-20b-5p  hsa-miR-17-5p  hsa-miR-27a-3p  hsa-miR-20b-5p  hsa-miR-125a-5p  hsa-miR-27a-3p  hsa-miR-507  hsa-miR-27a-3p  hsa-miR-17-5p  hsa-miR-363-3p  hsa-miR-17-5p  hsa-miR-20b-5p  hsa-miR-193a-3p  hsa-miR-17-5p  hsa-miR-17-5p  hsa-miR-23b-3p  hsa-miR-24-3p  hsa-miR-125b-5p  hsa-miR-20b-5p  hsa-miR-301b-3p  hsa-miR-125b-5p  hsa-miR-17-5p  hsa-miR-27a-3p  hsa-miR-23b-3p  hsa-miR-27a-3p  hsa-miR-17-5p  hsa-miR-24-3p  hsa-miR-107  hsa-miR-24-3p  hsa-miR-876-3p  hsa-miR-129-5p  hsa-miR-107  hsa-miR-129-5p  hsa-miR-17-5p  hsa-miR-17-5p  hsa-miR-17-5p  hsa-miR-27a-3p  hsa-miR-125b-5p  hsa-miR-301b-3p  hsa-miR-125b-5p  hsa-miR-1244  hsa-miR-17-5p  hsa-miR-146b-5p  hsa-miR-20b-5p  hsa-miR-125b-5p  hsa-miR-590-5p  hsa-miR-338-3p  hsa-miR-876-3p  hsa-miR-20b-5p  hsa-miR-23b-3p  hsa-miR-24-3p  hsa-miR-107  hsa-miR-20b-5p  hsa-miR-761  hsa-miR-17-5p  hsa-miR-429  hsa-miR-20b-5p  hsa-miR-363-3p  hsa-miR-1297  hsa-miR-125b-5p  hsa-miR-301b-3p  hsa-miR-17-5p  hsa-miR-125b-5p  hsa-miR-20b-5p  hsa-miR-17-5p | SAMD12  MASTL  MMP11  PODXL  CDH7  TCF4  FKTN  FBXW7  KAT2B  PPP1R15B  PRR14L  FSCN1  EP300  ZNF367  EFR3B  ADAT2  ANKRD33B  PRR14L  IRF1  TNFAIP3  TRIM37  MAP1B  PRR14L  ATL3  CPEB3  TRAF7  C9orf72  PRR14L  DYNLL2  ABCA1  LOXL2  MAP3K8  MAP1B  C17orf75  C1QTNF3  RRM2  FOS  EPM2AIP1  LONRF3  MAGI1  DCBLD2  GSK3B  CMTM3  EOGT  STAT3  GALNT14  UHMK1  EPM2AIP1  SPRED1  EOGT  GAB2  HOXB3  TMEM242  ANKRD50  PSD3  KANK4  DSTYK  SESN2  DENND5B  SATB1  SPRED1  M6PR  GNAL  GALNT1  GSK3B  PLAG1  HEG1  CDKN1A  ANKRD33B  KLF10  OCRL  RAPGEF4  COL4A4  PHLPP2  BMF  PIAS2  BCL2  UBB  FSCN1  WASF3  RAB5B  TGFB2  CYP1B1  ABCA1  CPOX  ATL3  TNFAIP3  VLDLR  DENND5B  NHLRC3  PAIP1  DPY19L4  PHLPP2  CBX1  MKLN1  GATA6  PLSCR4  NR4A2  TRIM37  JAG2  GAB1  GSG1  GABBR2  STK17B  SFRP1  DCBLD2  ANKRD50  CPT1A  PDE11A  DENND5B  ETS1  NR2F2  IER3IP1  ZNF24  SFRP1  M6PR  ATP2A2  RAB11FIP1  DCBLD2  KIAA0513  RAPGEF4  DCBLD2  TCF4  BCL2  BHLHB9  KATNAL1  TRABD2A  USP5  ANKRD33B  SLC2A3  NFAT5  PCTP  GAB1  TNRC18  TP63  NFAT5  ONECUT2  KLF12  RNF165  NFAT5  FOS  SGTB  ATAD2  ADORA2B  GALNT16  GNAL  ATAD2  SATB1  NFAT5  CSF1R  NPAS3  SMARCE1  TGFBR3  TET3  KATNBL1  PRR14L  TET3  RAB5B  RAB5B  PHLPP2  BTN3A2  GNAL  DSTYK  ATF7IP  EP300  GABBR2  ETV1  EN2  TRAF7  SLC26A2  SPTLC3  PPP1R15B  FBXW7  RASSF8  PPP1R15B  MASTL  RAB5B  PNPLA4  PSAT1  FAXC  EN2  PIP5K1C  NR4A2  MTMR9  SPTLC3  ITPR1  VLDLR  DCBLD2  KATNAL1  STK17B  FSD2  ZBTB10  SGTB  GPR155  BCL2  KAT2B  CLIP4  SAMD12  PCTP  EOGT  LFNG  EPM2AIP1  ZBTB10  RBFOX2  ANKRD33B  JAG2  GNS  DAB2  FAXC  TIAM2  ZBTB10  PPM1H  OCRL  TGFBR3  PEG10  MMP11  PRR14L  TET3  RAB11FIP1  PPP1R15B  FZD4  EP300  TRIM37  COX20  PRSS8  BACH2  SPRED1  KLF10  GALNT1  PAQR8  PLAG1  CDKN1A  OCRL  ENDOU  USP3  TNFAIP3  FBXW7  JAZF1  SLC25A25  GDF11  MAP1B  SGTB  KIAA0513  GDF11  RRM2  USP3  LBR  VGLL3  ETS1  PRR14L  TSPAN3  IL6R  RAB11FIP1  PLXND1  PRR14L  HIPK2  CLIP4  S100P  OGT  CMTM4  SIRPA  SNAP29  PRR14L  PHIP  FAS  STAT3  SIRPA  ABCA1  STAT3  HOXA5  ZNF395  SAT1  NFAT5  MMP16  PHLPP2  PLEKHA8  OLR1  GATA6  ZNF552  SESN2  SESN2  SH3PXD2A  PAG1  STAT3  ZBTB10  GNS  FSCN1  GDF11  CPEB3  TET3  ANKRD33B  MB21D2  F2R  VDR  GNS  NHLRC3 |

Table S6 The top 10 GO terms for biological processes enriched by the target mRNAs

| ID | Description |
| --- | --- |
| GO:0022612 | gland morphogenesis |
| GO:0048732 | gland development |
| GO:0030522 | intracellular receptor signaling pathway |
| GO:0030099 | myeloid cell differentiation |
| GO:0090092 | regulation of transmembrane receptor protein serine/threonine kinase signaling pathway |
| GO:0008593 | regulation of Notch signaling pathway |
| GO:0007219 | Notch signaling pathway |
| GO:0070482 | response to oxygen levels |
| GO:0045747 | positive regulation of Notch signaling pathway |
| GO:0070997 | neuron death |

Table S7 The top 10 KEGG signaling pathways enriched by the target mRNAs

| ID | Description |
| --- | --- |
| hsa00514 | Other types of O-glycan biosynthesis |
| hsa04928 | Parathyroid hormone synthesis, secretion and action |
| hsa05417 | Lipid and atherosclerosis |
| hsa05211 | Renal cell carcinoma |
| hsa05167 | Kaposi sarcoma-associated herpesvirus infection |
| hsa04115 | p53 signaling pathway |
| hsa05206 | MicroRNAs in cancer |
| hsa01521 | EGFR tyrosine kinase inhibitor resistance |
| hsa05161 | Hepatitis B |
| hsa05210 | Colorectal cancer |

Table S8 The genes that were statistically significant in the univariate analysis

| Gene | HR | 95%CI (low) | 95%CI (high) | p-value |
| --- | --- | --- | --- | --- |
| MASTL | 1.048 | 1.006 | 1.091 | 0.025 |
| KAT2B | 0.904 | 0.839 | 0.974 | 0.008 |
| FSCN1 | 1.009 | 1.005 | 1.012 | 0.000 |
| ZNF367 | 1.080 | 1.000 | 1.166 | 0.049 |
| ANKRD33B | 1.167 | 1.005 | 1.354 | 0.043 |
| MAP1B | 1.018 | 1.000 | 1.037 | 0.050 |
| CPEB3 | 0.624 | 0.425 | 0.915 | 0.016 |
| TRAF7 | 1.017 | 1.000 | 1.034 | 0.049 |
| LOXL2 | 1.017 | 1.011 | 1.022 | 0.000 |
| RRM2 | 1.024 | 1.013 | 1.036 | 0.000 |
| EPM2AIP1 | 0.889 | 0.810 | 0.976 | 0.013 |
| MAGI1 | 0.881 | 0.780 | 0.996 | 0.043 |
| DCBLD2 | 1.010 | 1.002 | 1.017 | 0.009 |
| KLF10 | 1.021 | 1.004 | 1.037 | 0.014 |
| COL4A4 | 0.941 | 0.889 | 0.996 | 0.037 |
| NR4A2 | 1.009 | 1.000 | 1.019 | 0.048 |
| STK17B | 0.971 | 0.949 | 0.992 | 0.009 |
| USP5 | 1.015 | 1.004 | 1.027 | 0.010 |
| ETV1 | 0.954 | 0.917 | 0.992 | 0.019 |
| GPR155 | 0.797 | 0.639 | 0.994 | 0.044 |
| FZD4 | 1.025 | 1.000 | 1.050 | 0.046 |
| LBR | 1.022 | 1.005 | 1.040 | 0.013 |
| IL6R | 0.973 | 0.948 | 0.999 | 0.042 |
| PLXND1 | 0.987 | 0.976 | 0.999 | 0.029 |
| S100P | 1.000 | 1.000 | 1.001 | 0.001 |
| OGT | 0.985 | 0.972 | 0.998 | 0.020 |
| MMP16 | 1.322 | 1.022 | 1.708 | 0.033 |
| MB21D2 | 1.069 | 1.013 | 1.128 | 0.015 |

Table S9 The results of multivariate Cox regression analysis for target mRNAs

| Gene | coef | HR | 95%CI (low) | 95%CI (high) | p-value |
| --- | --- | --- | --- | --- | --- |
| FSCN1 | 0.007 | 1.007 | 1.003 | 1.011 | 0.000 |
| DCBLD2 | 0.007 | 1.007 | 0.999 | 1.015 | 0.090 |
| KLF10 | 0.032 | 1.032 | 1.014 | 1.051 | 0.001 |
| STK17B | -0.021 | 0.980 | 0.956 | 1.004 | 0.103 |
| GPR155 | -0.220 | 0.803 | 0.624 | 1.033 | 0.088 |
| FZD4 | 0.025 | 1.025 | 1.002 | 1.049 | 0.034 |
| LBR | 0.029 | 1.029 | 1.010 | 1.050 | 0.004 |
| PLXND1 | -0.014 | 0.986 | 0.974 | 0.999 | 0.032 |
| S100P | 0.001 | 1.001 | 1.000 | 1.001 | 0.000 |
